# Supplementary material
Source: publisher figshare collection journal article supplement (https://aacr.figshare.com/ndownloader/files/39854793)
Supplement: Supplementary file 1 [file 39854793]

## Sheet: Mutated HyperDownHR genes_85
hgnc_symbol	Pugh et al., 2013	Sausen et al., 2013	Molenaar et al., 2012
ABCB1	X
ADCY1			X
AGT	X	X
AHNAK	X		X
ANO6			X
AQP1	X
ARHGDIB	X
ASB2	X
BCL2			X
CD247	X
CDKN2D	X
CNTNAP2	X
COG5	X
COL1A1	X
CREB5	X
CSGALNACT1			X
DGKB			X
DLC1	X		X
DLG2			X
DOCK4	X
DPP6			X
DPYSL3	X
EBF1			X
ENOX1	X	X	X
EPHA5			X
FAM102B			X
GDPD5	X
GIMAP8	X
GPR158	X
GRID2	X
HEYL	X
ICA1			X
IGSF21	X
INPP5D	X
KCNH8	X
KIF1B			X
KIF26B	X
KLHL6	X
KNDC1	X
LIFR			X
LRRC55	X
LRRTM4	X		X
MAP7	X
MATN2			X
MYO15A	X
NCKAP5			X
NES	X
NRP2	X
NXPH1			X
OSBPL3	X
PAPLN	X
PCDH9	X
PCDHB5	X
PGM2L1	X
PLCD4	X
PLXNC1	X
PPAPDC1A	X	X
PRDM2	X
PRUNE2	X
PTGER4	X
RARRES3	X		X
RFTN1	X
RGS5			X
RIMS3	X
ROBO3	X
SCG2	X
SDK1	X
SERPINA5	X
SHC1	X
SLC8A1	X		X
SLCO3A1	X
SNTG2			X
SORL1	X
SPEG	X
SPOCK1			X
SPOCK2	X	X
SRGAP1	X
STAB1	X
TG	X
TIAM2	X
TLN2	X
VAT1L	X
XKR4			X
ZFHX4	X
ZFP36L2	X
